# Supplementary material for: Comparison of Short-Term Outcomes and Safety Profiles between Androgen Deprivation Therapy+Abiraterone/Prednisone and Androgen Deprivation Therapy+Docetaxel in Patients with De Novo Metastatic Hormone-Sensitive Prostate Cancer
Source: PubMed Central journal article supplement — World J Mens Health. 2024 Jan 2;42(3):620–9. doi: 10.5534/wjmh.230104 (PMC11216961; doi:10.5534/wjmh.230104), 2024-01-02
Supplement: wjmh-42-620-s001.pdf [file wjmh-42-620-s001.pdf]

**Supplement Table 1.** Demographic characteristics and past medical history of the study population

| Variable                 | Total (n=122) | ADT+abiraterone (n=102) | ADT+docetaxel (n=20) | p-value |
|--------------------------|---------------|-------------------------|----------------------|---------|
| Age (y)                  | 68.9±8.3      | 69.5±8.3                | 65.8±7.8             | 0.065   |
| BMI (kg/m <sup>2</sup> ) | 23.9±2.9      | 23.8±3.0                | 24.7±2.4             | 0.199   |
| ECOG PS                  |               |                         |                      | 0.777   |
| 0                        | 94 (77.0)     | 79 (77.5)               | 15 (75.0)            |         |
| ≥1                       | 28 (23.0)     | 23 (22.5)               | 5 (25.0)             |         |
| DM                       | 23 (18.9)     | 18 (17.6)               | 5 (25.0)             | 0.684   |
| Hypertension             | 58 (47.5)     | 44 (43.1)               | 14 (70.0)            | 0.086   |
| CCI score                |               |                         |                      | 0.111   |
| 0–1                      | 101 (82.8)    | 87 (85.3)               | 14 (70.0)            |         |
| ≥2                       | 21 (17.2)     | 15 (14.7)               | 6 (30.0)             |         |
| Smoking                  |               |                         |                      | 0.744   |
| Nonsmoker                | 35 (28.7)     | 29 (28.4)               | 6 (30.0)             |         |
| Ex smoker                | 46 (38.7)     | 38 (37.3)               | 8 (40.0)             |         |
| Current smoker           | 15 (12.3)     | 14 (13.7)               | 1 (5.0)              |         |
| Unknown                  | 26 (21.3)     | 21 (20.6)               | 5 (25.0)             |         |

Values are presented as means±standard deviations, medians (interquartile ranges), or numbers (%), unless otherwise indicated.

ADT: androgen-deprivation therapy, BMI: body mass index, CCI: Charlson Comorbidity Index, DM: diabetes mellitus, ECOG PS: Eastern Cooperative Oncology Group performance status.
