# Supplementary material for: Comparison of Short-Term Outcomes and Safety Profiles between Androgen Deprivation Therapy+Abiraterone/Prednisone and Androgen Deprivation Therapy+Docetaxel in Patients with De Novo Metastatic Hormone-Sensitive Prostate Cancer
Source: PubMed Central journal article supplement — World J Mens Health. 2024 Jan 2;42(3):620–9. doi: 10.5534/wjmh.230104 (PMC11216961; doi:10.5534/wjmh.230104), 2024-01-02
Supplement: wjmh-42-620-s002.pdf [file wjmh-42-620-s002.pdf]

**Supplement Table 2.** Baseline cancer status of the study population

| Variable                           | Total (n=122)      | ADT+abiraterone (n=102) | ADT+docetaxel (n=20) | p-value |
|------------------------------------|--------------------|-------------------------|----------------------|---------|
| PSA at initial diagnosis (ng/mL)   | 142.7 (54.7–626.3) | 150.0 (55.5–651.0)      | 100.0 (52.7–604.7)   | 0.596   |
| PSA at metastasis (ng/mL)          | 151.6 (57.4–626.3) | 161.6 (62.6–664.8)      | 86.0 (44.2–500.0)    | 0.292   |
| Testosterone at metastasis (ng/mL) | 3.3 (2.6–4.8)      | 3.7 (2.7–5.7)           | 2.8 (2.6–3.4)        | 0.192   |
| Clinical tumor stage               |                    |                         |                      | 0.083   |
| ≤T3a                               | 16 (13.1)          | 10 (9.8)                | 6 (30.0)             |         |
| T3b                                | 42 (34.4)          | 36 (35.3)               | 6 (30.0)             |         |
| T4                                 | 59 (48.4)          | 51 (50.0)               | 8 (40.0)             |         |
| Unknown                            | 5 (5.1)            | 5 (4.9)                 | 0 (0.0)              |         |
| ECE                                |                    |                         |                      | 0.834   |
| No                                 | 5 (5.1)            | 4 (3.9)                 | 1 (5.0)              |         |
| Yes                                | 103 (84.4)         | 87 (85.3)               | 16 (80.0)            |         |
| Unknown                            | 14 (11.5)          | 11 (10.8)               | 3 (15.0)             |         |
| SVI                                |                    |                         |                      | 0.166   |
| No                                 | 16 (13.1)          | 11 (10.8)               | 5 (25.0)             |         |
| Yes                                | 92 (75.4)          | 80 (78.4)               | 12 (60.0)            |         |
| Unknown                            | 14 (11.5)          | 11 (10.8)               | 3 (15.0)             |         |
| Gleason score                      |                    |                         |                      | 0.695   |
| ≤8                                 | 60 (49.2)          | 51 (50.0)               | 9 (45.0)             |         |
| ≥9                                 | 59 (48.4)          | 49 (48.0)               | 10 (50.0)            |         |
| Unknown                            | 3 (2.5)            | 2 (2.0)                 | 1 (5.0)              |         |
| No. of positive cores              | 8.0 (6.0–12.0)     | 8.0 (6.0–12.0)          | 10.0 (5.0–12.5)      | 0.605   |
| No. of total cores                 | 12.0 (12.0–12.0)   | 12.0 (12.0–12.0)        | 12.0 (6.0–14.0)      | 0.525   |
| % Of positive cores                | 91.7 (60.7–100.0)  | 90.3 (58.3–100.0)       | 95.8 (71.1–100.0)    | 0.215   |
| Max. rate (%)                      | 90.0 (75.0–100.0)  | 90.0 (75.0–100.0)       | 91.9 (80.6–100.0)    | 0.285   |

Values are presented as medians (interquartile ranges) or numbers (%), unless otherwise indicated.

ECE: extracapsular extension, PSA: prostate-specific antigen, SVI: seminal vesicle invasion, Max: maximum.
