# Supplementary material for: Comparison of Short-Term Outcomes and Safety Profiles between Androgen Deprivation Therapy+Abiraterone/Prednisone and Androgen Deprivation Therapy+Docetaxel in Patients with De Novo Metastatic Hormone-Sensitive Prostate Cancer
Source: PubMed Central journal article supplement — World J Mens Health. 2024 Jan 2;42(3):620–9. doi: 10.5534/wjmh.230104 (PMC11216961; doi:10.5534/wjmh.230104), 2024-01-02
Supplement: wjmh-42-620-s003.pdf [file wjmh-42-620-s003.pdf]

**Supplement Table 3.** Initial laboratory tests

| Variable                                  | Total (n=122)      | ADT+abiraterone (n=102) | ADT+docetaxel (n=20) | p-value |
|-------------------------------------------|--------------------|-------------------------|----------------------|---------|
| WBC (10 <sup>3</sup> /μL)                 | 6.6±2.0            | 6.5±2.0                 | 6.8±2.0              | 0.586   |
| Hb (g/dL)                                 | 13.2±1.8           | 13.2±1.8                | 13.5±1.8             | 0.415   |
| Platelet (10 <sup>3</sup> /μL)            | 232.5±70.1         | 238.1±72.6              | 207.4±51.3           | 0.076   |
| Seg. neutrophil (%)                       | 61.2±10.4          | 60.7±10.8               | 63.0±8.8             | 0.395   |
| Lymphocyte (%)                            | 27.8±8.9           | 28.2±9.1                | 25.9±8.3             | 0.320   |
| ANC                                       | 4.1±1.7            | 4.1±1.8                 | 4.3±1.4              | 0.657   |
| PT, INR                                   | 1.0±0.1            | 1.0±0.1                 | 1.0±0.1              | 0.180   |
| PT (sec)                                  | 12.9 (12.2–13.5)   | 12.8 (12.2–13.5)        | 13.2 (12.2–13.8)     | 0.173   |
| Calcium (mg/dL)                           | 9.1±0.5            | 9.1±0.5                 | 9.0±0.5              | 0.445   |
| Phosphorus (mg/dL)                        | 3.4±0.6            | 3.4±0.6                 | 3.3±0.6              | 0.546   |
| BUN (mg/dL)                               | 17.5±5.2           | 17.3±5.0                | 18.2±6.0             | 0.500   |
| Creatinine (mg/dL)                        | 0.9 (0.8–1.0)      | 0.9 (0.8–1.0)           | 0.8 (0.8–1.0)        | 0.387   |
| GFR (IDMS-MDRD), (mL/min/m <sup>2</sup> ) | 87.3±21.3          | 87.3±21.9               | 86.8±19.0            | 0.922   |
| Uric acid (mg/dL)                         | 5.2±1.5            | 5.2±1.6                 | 5.1±1.6              | 0.804   |
| Total protein (g/dL)                      | 7.1±0.6            | 7.2±0.6                 | 6.9±0.5              | 0.116   |
| Albumin (g/dL)                            | 4.2±0.4            | 4.2±0.4                 | 4.2±0.5              | 0.941   |
| Total bilirubin (mg/dL)                   | 0.6 (0.5–0.9)      | 0.6 (0.5–0.8)           | 0.8 (0.5–1.1)        | 0.044   |
| ALP (IU/L)                                | 127.0 (82.0–207.0) | 117.0 (77.5–198.5)      | 192.0 (104.0–341.0)  | 0.029   |
| AST (IU/L)                                | 25.0 (21.0–31.5)   | 23.0 (19.0–29.0)        | 29.5 (21.8–36.5)     | 0.034   |
| ALT (IU/L)                                | 19.0 (14.0–27.0)   | 19.0 (14.0–26.0)        | 21.5 (14.5–30.8)     | 0.307   |
| Sodium (mmol/L)                           | 139.0±3.2          | 138.9±3.3               | 139.5±2.1            | 0.495   |
| Potassium (mmol/L)                        | 4.3±0.4            | 4.3±0.4                 | 4.3±0.4              | 0.514   |
| Chloride (mmol/L)                         | 103.6±3.4          | 103.4±3.5               | 104.6±3.1            | 0.243   |

Values are presented as means±standard deviations or medians (interquartile ranges), unless otherwise indicated.

ADT: androgen-deprivation therapy, ALP: alkaline phosphatase, ALT: alanine aminotransferase, ANC: absolute neutrophil count, AST: aspartate aminotransferase, BUN: blood urea nitrogen, GFR: glomerular filtration rate, Hb: hemoglobin, IDMS: isotope dilution mass spectrometer, INR: international normalized ratio, MDRD: modification of diet in renal disease, PT: prothrombin time, WBC: white blood cell, Seg: segmented.
